# Supplementary material for: Adipsin and adipocyte-derived C3aR1 regulate thermogenic fat in a sex-dependent fashion
Source: JCI journal article supplement (doi:10.1172/jci.insight.178925), 2024-05-07

Full unedited Blot: Female BAT for Figure 5C

IB: Ucp1

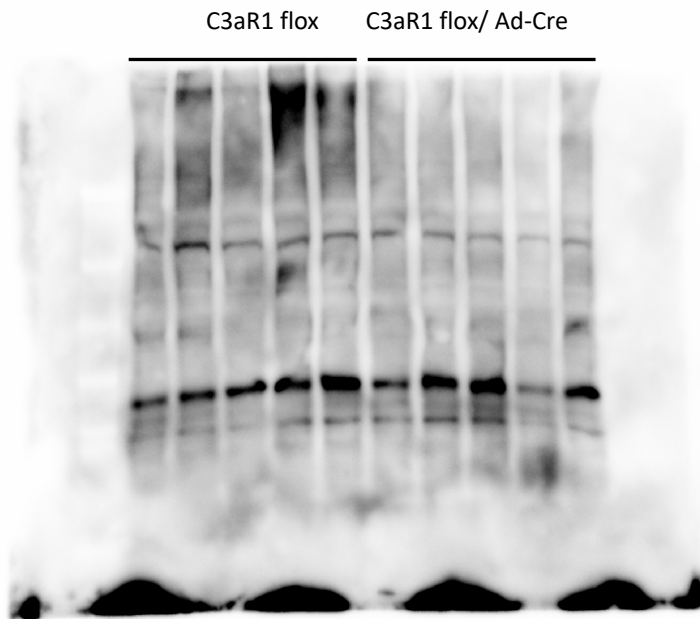

IB: Beta-actin

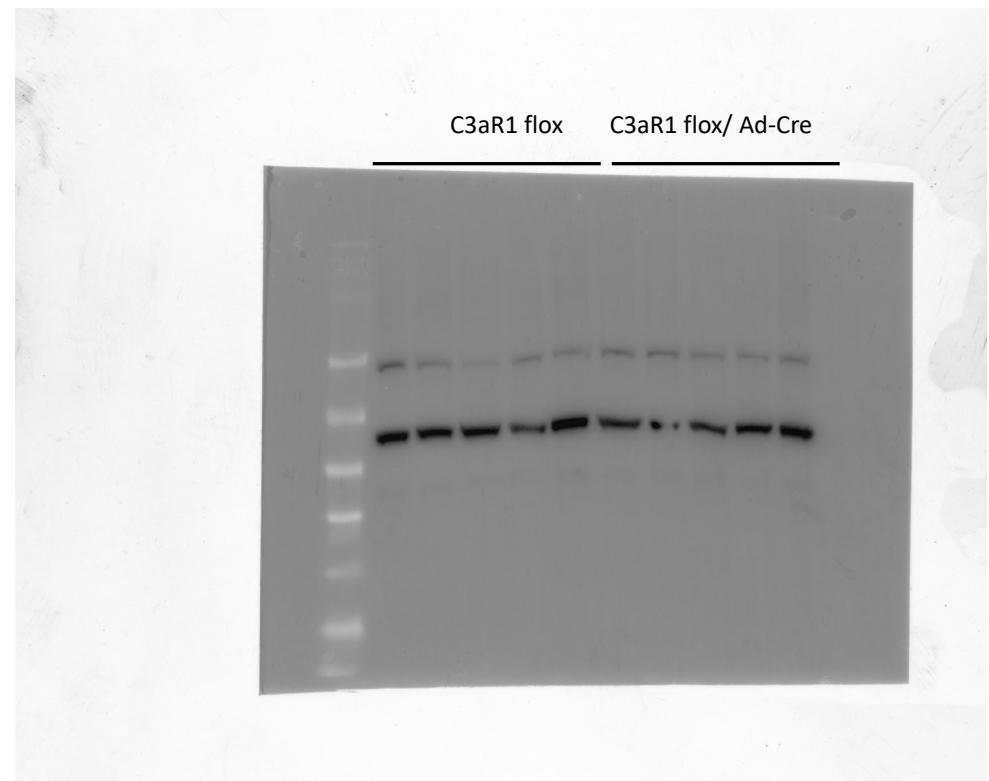

Full unedited Blot: Female SAT for Figure 5D

IB: Ucp1

IB: Beta-actin

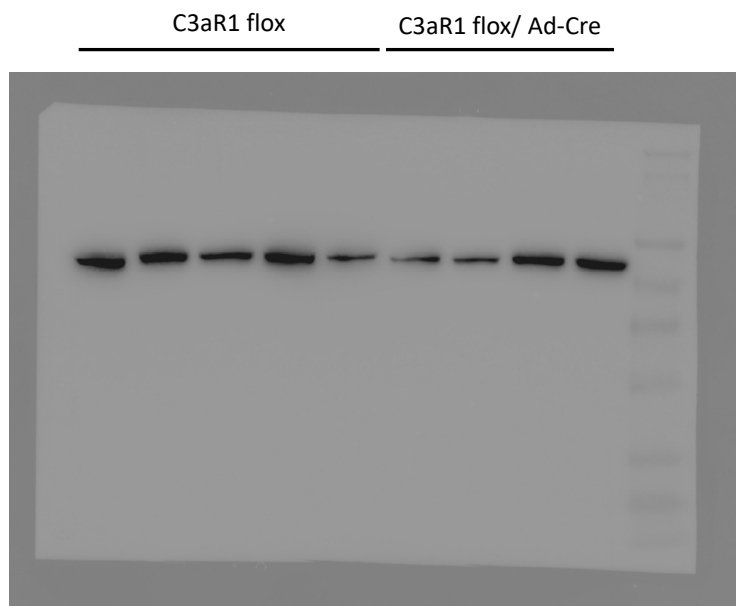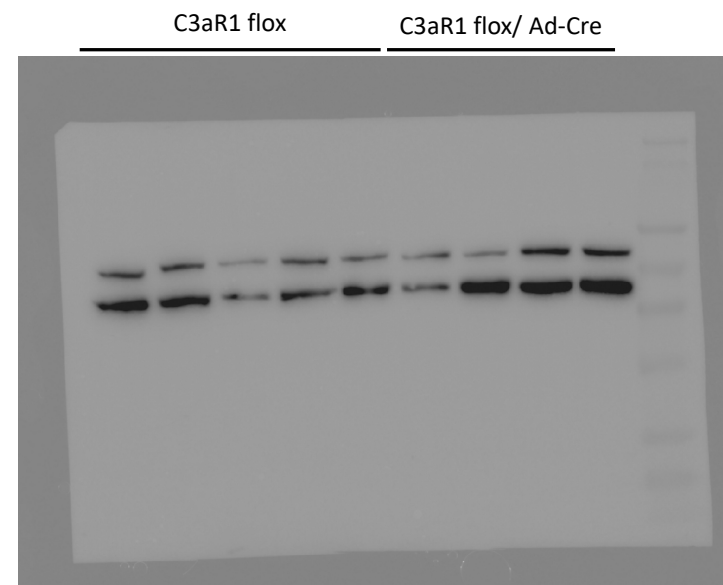

Supplement: sd2 [file 2]
